# Supplementary material for: Mapping and Detection of Genes Related to Trichome Development in Black Gram (Vigna mungo (L.) Hepper)
Source: MDPI journal article supplement (doi:10.3390/genes15030308), 2024-02-27
Supplement: s1 [file s1]

**Table S1.** Primers used in the study

| Primer    | Sequence (5' to 3')    | Target                         | Product size (bp) |
|-----------|------------------------|--------------------------------|-------------------|
| SCA-163-F | GGACGATGACTTCCGTCCTA   | Scaffold_9372_HRSCAF_11447.163 | 229               |
| SCA-163-R | TCTGGGCTTATCCCGTATTG   |                                |                   |
| SCA-164-F | CTGTCTCGCACTGAAATCCTGA | Scaffold_9372_HRSCAF_11447.164 | 207               |
| SCA-164-R | ACTCCCCACTTGCACTGAGA   |                                |                   |
| SCA-165-F | AAGATGGATGGGGCAGTGC    | Scaffold_9372_HRSCAF_11447.165 | 274               |
| SCA-165-R | CAAGCTTCAAACCATGGCCC   |                                |                   |
| SCA-166-F | GGAGGACTTGGAACGATGG    | Scaffold_9372_HRSCAF_11447.166 | 232               |
| SCA-166-R | CCTGTCTACTGGCCCGACTA   |                                |                   |
| SCA-167-F | TGGCTTCTTCTGGGTGGTG    | Scaffold_9372_HRSCAF_11447.167 | 223               |
| SCA-167-R | ATTGCCACCTCTCAAACGGG   |                                |                   |
| SCA-168-F | CAACTGGGGTGATGAGAGGT   | Scaffold_9372_HRSCAF_11447.168 | 289               |
| SCA-168-R | AGCAAAGGGCTCCATTGTTA   |                                |                   |
| Actin-F   | GTTCTGTTCCAGCCATCCAT   | Actin                          | 220               |
| Actin-R   | GTGGTGCGACAACCTTGATT   |                                |                   |
