# Supplementary material for: Mapping and Detection of Genes Related to Trichome Development in Black Gram (Vigna mungo (L.) Hepper)
Source: MDPI journal article supplement (doi:10.3390/genes15030308), 2024-02-27
Supplement: s1 [file s1]

**Table S2.** phenotype of parents and F<sub>2</sub> lines

| Lines | Phenotype | Lines | Phenotype | Lines | Phenotype | Lines  | Phenotype | Lines  | Phenotype | Lines  | Phenotype | Lines  | Phenotype |
|-------|-----------|-------|-----------|-------|-----------|--------|-----------|--------|-----------|--------|-----------|--------|-----------|
| P1    | T         | R27-1 | T         | R57-1 | G         | R87-1  | T         | R117-1 | T         | R146-1 | G         | R175-1 | T         |
| P2    | G         | R28-1 | G         | R58-1 | T         | R88-1  | T         | R118-1 | T         | R147-1 | T         | R176-1 | T         |
| R1-1  | G         | R29-1 | T         | R59-1 | T         | R89-1  | T         | R119-1 | T         | R148-1 | G         | R177-1 | G         |
| R2-1  | T         | R30-1 | T         | R60-1 | G         | R90-1  | T         | R120-1 | T         | R149-1 | T         | R178-1 | G         |
| R3-1  | G         | R31-1 | T         | R61-1 | T         | R91-1  | G         | R121-1 | T         | R150-1 | T         | R179-1 | G         |
| R4-1  | T         | R32-1 | G         | R62-1 | T         | R92-1  | T         | R122-1 | T         | R151-1 | T         | R180-1 | G         |
| R5-1  | T         | R33-1 | T         | R63-1 | T         | R93-1  | T         | R123-1 | T         | R152-1 | T         | R181-1 | T         |
| R6-1  | T         | R34-1 | T         | R64-1 | T         | R94-1  | T         | R124-1 | T         | R153-1 | T         | R182-1 | T         |
| R7-1  | G         | R35-1 | T         | R65-1 | G         | R95-1  | T         | R125-1 | T         | R154-1 | T         | R183-1 | T         |
| R8-1  | G         | R36-1 | G         | R66-1 | G         | R96-1  | T         | R126-1 | G         | R155-1 | G         | R184-1 | T         |
| R9-1  | T         | R38-1 | G         | R67-1 | T         | R97-1  | T         | R127-1 | T         | R156-1 | T         | R185-1 | G         |
| R10-1 | T         | R39-1 | G         | R68-1 | G         | R98-1  | T         | R128-1 | T         | R157-1 | T         | R186-1 | G         |
| R11-1 | T         | R40-1 | T         | R69-1 | T         | R99-1  | T         | R129-1 | T         | R158-1 | T         | R187-1 | T         |
| R12-1 | G         | R41-1 | G         | R70-1 | T         | R100-1 | T         | R131-1 | T         | R160-1 | T         | R188-1 | T         |
| R13-1 | T         | R43-1 | G         | R71-1 | G         | R101-1 | T         | R132-1 | T         | R161-1 | T         | R189-1 | T         |
| R14-1 | T         | R44-1 | T         | R72-1 | T         | R102-1 | G         | R133-1 | T         | R162-1 | T         | R190-1 | T         |
| R15-1 | T         | R45-1 | G         | R73-1 | T         | R103-1 | T         | R134-1 | T         | R163-1 | T         | R191-1 | G         |
| R16-1 | T         | R46-1 | T         | R74-1 | T         | R105-1 | G         | R135-1 | G         | R164-1 | T         | R192-1 | T         |
| R17-1 | G         | R47-1 | T         | R75-1 | T         | R106-1 | G         | R136-1 | T         | R165-1 | T         | R193-1 | G         |
| R18-1 | T         | R48-1 | T         | R76-1 | T         | R107-1 | T         | R137-1 | T         | R166-1 | T         | R194-1 | T         |
| R19-1 | T         | R49-1 | T         | R77-1 | T         | R108-1 | T         | R138-1 | T         | R167-1 | G         | R195-1 | T         |
| R20-1 | T         | R50-1 | G         | R78-1 | T         | R109-1 | T         | R139-1 | T         | R168-1 | T         | R196-1 | T         |
| R21-1 | T         | R51-1 | T         | R79-1 | T         | R110-1 | T         | R140-1 | G         | R169-1 | T         | R197-1 | G         |
| R22-1 | T         | R52-1 | T         | R80-1 | T         | R111-1 | T         | R141-1 | T         | R170-1 | T         | R198-1 | T         |
| R23-1 | G         | R53-1 | T         | R81-1 | T         | R112-1 | T         | R142-1 | T         | R171-1 | G         | R200-1 | T         |
| R24-1 | T         | R54-1 | T         | R83-1 | T         | R113-1 | T         | R143-1 | T         | R172-1 | T         | R201-1 | T         |
| R25-1 | T         | R55-1 | T         | R84-1 | T         | R114-1 | T         | R144-1 | T         | R173-1 | G         | R202-1 | T         |
| R26-1 | T         | R56-1 | T         | R86-1 | T         | R115-1 | G         | R145-1 | G         | R174-1 | G         |        |           |

T, Trichome; G, glabrous
