# Supplementary material for: Mapping and Detection of Genes Related to Trichome Development in Black Gram (Vigna mungo (L.) Hepper)
Source: MDPI journal article supplement (doi:10.3390/genes15030308), 2024-02-27
Supplement: s1 [file s1]

**Table S4.** The spearman of collinearity analysis between linkage groups and chromosomes

| LG ID Spearman           | Spearman |
|--------------------------|----------|
| LG Scaffold_HRSCAF_5891  | 0.9999   |
| LG Scaffold_HRSCAF_2711  | 0.9978   |
| LG Scaffold_HRSCAF_2373  | 0.9991   |
| LG Scaffold_HRSCAF_11446 | 0.9996   |
| LG Scaffold_HRSCAF_11447 | 0.9999   |
| LG Scaffold_HRSCAF_4343  | 0.9995   |
| LG Scaffold_HRSCAF_4236  | 0.9982   |
| LG Scaffold_HRSCAF_10972 | 0.9997   |
| LG Scaffold_HRSCAF_5881  | 0.9998   |
| LG Scaffold_HRSCAF_11449 | 0.9924   |
| LG Scaffold_HRSCAF_11448 | 0.9991   |
